# Supplementary material
Source: publisher site journal article supplement (https://www.dovepress.com/get_supplementary_file.php?f=252485.xlsx)
Supplement: Supplementary file 2 [file get_supplementary_file.php]

## Sheet: Sheet1
编号	脓肿分型	LZD	SXT	FEP	CRO	FOX	TOB	DOX	TIG	CIP	MIN	MXF	AMK	AMC	CLA 3	CLA 14	CAZ	CAZ+AVI4	IPM	IPM+AVI4	IPM+CAZ100	IPM+CAZ100+AVI4	erm	rrl
N36	M. abscessus	32	>8	>32	>64	32	8	16	0.25	2	>8	4	8	>64	0.25	8	512	256	32	32	16	16	T28
2459	M. bolletii	>32	>8	>32	>64	128	4	>16	1	4	>8	8	4	>64	8	8	256	256	2	2	1	1
2088	M. abscessus	16	>8	>32	>64	128	8	16	0.5	4	4	4	8	>64	2	16	512	512	8	4	2	4	T28
1389	M. abscessus	≤1	2	32	64	32	8	4	1	4	>8	2	4	32	1	>16	256	256	16	32	8	8	T28
2180	M. abscessus	≤1	8	32	64	16	4	4	0.5	4	8	4	4	>64	1	>16	128	128	16	16	2	2	T28
1931	M. abscessus	32	>8	>32	>64	64	8	>16	0.25	4	8	4	8	>64	0.25	8	512	512	32	16	4	4	T28
2146	M. abscessus	32	8	>32	>64	64	8	>16	>4	>4	>8	>8	8	>64	≤0.06	8	256	256	32	64	4	4	T28
2533	M. massiliense	>32	>8	>32	>64	128	>16	>16	2	>4	>8	>8	32	>64	1	1	256	256	2	1	1	0.5	Truncated
1279	M. abscessus	>32	>8	32	>64	32	16	>16	1	>4	>8	8	16	>64	0.5	8	256	128	32	32	8	8	T28
N43	M. abscessus	32	8	>32	>64	64	16	>16	0.5	4	>8	>8	8	>64	2	16	256	256	32	32	4	4	T28
N42	M. abscessus	16	2	32	32	16	4	>16	0.5	4	>8	8	16	64	2	16	512	256	16	16	4	8	T28
2497	M. bolletii	>32	>8	>32	>64	64	16	>16	2	>4	>8	>8	16	>64	0.5	0.5	512	256	4	4	2	1
2029	M. abscessus	16	4	>32	64	16	8	2	0.5	2	>8	2	4	64	2	>16	256	256	16	8	8	8	T28
2031	M. abscessus	32	>8	>32	>64	64	2	>16	0.5	2	>8	8	8	>64	1	8	1024	1024	16	32	8	8	T28
2036	M. abscessus	32	8	>32	>64	32	8	2	0.25	4	≤1	4	4	>64	0.5	8	256	256	16	32	8	4	T28
1769	M. bolletii	>32	>8	>32	>64	128	>16	>16	2	>4	>8	>8	64	>64	>16	>16	512	512	4	4	2	2
1015	M. abscessus	>32	8	>32	>64	64	16	>16	1	4	>8	4	8	>64	1	8	1024	1024	16	32	8	8	T28
1426	M. bolletii	>32	>8	>32	>64	128	>16	>16	4	>4	>8	>8	32	>64	0.25	8	512	512	4	4	4	2	T28
1032	M. abscessus	32	8	>32	>64	64	16	>16	1	4	>8	8	16	>64	2	8	256	256	16	8	4	4	T28
7K1423	M. massiliense	16	2	32	64	64	8	4	4	4	8	2	8	>64	1	1	>1024	1024	8	8	4	4	Truncated
750	M. abscessus	32	>8	>32	>64	32	16	>16	2	>4	>8	>8	32	>64	2	>16	512	512	16	8	4	2	T28
2573	M. abscessus	32	>8	>32	>64	128	8	>16	1	>4	>8	8	8	>64	2	16	256	256	32	32	8	8	T28
2220	M. abscessus	32	>8	32	64	64	16	>16	1	>4	>8	8	16	>64	2	>16	256	256	32	32	8	8	T28
1870	M. massiliense	>32	>8	>32	>64	64	16	>16	1	>4	>8	>8	16	>64	>16	>16	1024	1024	8	8	4	4	Truncated	1
2033	M. abscessus	2	1	>32	>64	128	≤1	0.5	1	4	≤1	1	≤1	64	2	8	256	128	2	2	1	1	T28
1755	M. massiliense	>32	>8	>32	>64	64	16	>16	2	>4	>8	>8	32	>64	0.5	0.5	512	512	8	8	4	4	Truncated
1191	M. abscessus	32	8	32	<=4	16	8	4	0.5	2	>8	8	8	>64	0.5	16	256	128	2	2	1	1	T28
1777	M. abscessus	32	8	>32	>64	16	16	2	0.5	4	>8	2	2	64	1	16	256	128	2	2	1	1	T28
2354	M. abscessus	32	>8	>32	>64	64	16	>16	1	>4	>8	4	8	>64	0.5	8	256	256	2	2	1	1	T28
976	M. abscessus	32	8	>32	>64	64	16	>16	0.5	>4	>8	8	8	>64	2	>16	256	256	4	4	4	4	T28
1789	M. massiliense	>32	8	>32	>64	128	>16	>16	0.5	>4	>8	>8	16	>64	2	2	512	512	8	8	4	4	Truncated
1260	M. massiliense	32	>8	>32	>64	64	>16	>16	2	>4	>8	>8	32	>64	0.5	0.5	256	256	8	4	4	2	Truncated
747	M. abscessus	32	>8	>32	>64	64	>16	>16	0.5	>4	>8	8	16	>64	≤0.06	8	256	256	4	4	4	2	T28
2048	M. abscessus	8	4	>32	>64	16	8	>16	4	2	>8	4	8	>64	≤0.06	8	1024	1024	8	8	4	4	T28
7K114	M. massiliense	32	4	32	64	32	8	8	0.5	4	8	8	32	16	1	1	512	512	16	16	8	8	Truncated
1921	M. abscessus	>32	>8	>32	>64	64	16	>16	1	>4	>8	>8	32	>64	1	>16	512	512	8	8	4	4	T28
7L152	M. abscessus	16	2	32	64	128	8	2	2	4	8	4	8	>64	8	>16	1024	1024	16	16	8	4	T28
7L129	M. abscessus	32	8	>32	>64	32	8	>16	0.5	4	>8	4	8	>64	0.5	>16	256	256	16	8	4	4	T28
701	M. abscessus	32	8	>32	>64	64	16	0.5	2	>4	4	8	16	>64	0.5	16	512	512	16	16	8	8	T28
N46	M. bolletii	32	8	32	64	64	16	2	0.5	4	8	8	32	64	0.5	16	512	512	16	16	8	8	T28
7K198	M. bolletii	8	4	32	64	128	16	2	0.25	4	8	2	4	64	0.25	>16	256	256	16	16	8	8	T28
N27	M. abscessus	32	4	>32	>64	64	16	16	0.25	>4	>8	4	16	>64	16	8	512	512	16	16	4	4	T28
6K1002	M. abscessus	32	8	>32	>64	64	16	>16	0.25	4	>8	4	8	>64	2	16	512	256	16	16	4	4	T28
8K1406	M. bolletii	16	2	>32	64	128	4	8	2	>4	8	4	8	>64	0.5	>16	1024	1024	16	16	8	8	T28
1773	M. abscessus	32	>8	>32	>64	128	16	>16	1	>4	>8	8	16	>64	0.5	8	>1024	>1024	16	16	16	8	T28
6K50	M. abscessus	32	>8	>32	>64	64	16	>16	1	>4	>8	>8	8	>64	0.5	16	256	256	16	16	4	4	T28
1932	M. abscessus	>32	>8	>32	>64	64	16	>16	1	>4	>8	>8	32	>64	1	16	512	256	16	16	8	8	T28
1884	M. abscessus	>32	>8	>32	>64	128	16	>16	1	>4	>8	>8	16	>64	0.5	8	512	512	16	8	4	4	T28
6K1366	M. abscessus	32	>8	>32	>64	64	4	>16	1	4	>8	8	8	>64	0.5	8	512	512	32	32	8	8	T28
6K1019	M. abscessus	16	8	>32	>64	16	8	>16	0.5	4	>8	4	4	>64	8	8	512	512	32	16	8	8	T28
2536	M. abscessus	32	8	>32	>64	128	8	4	1	4	>8	4	16	>64	2	2	128	128	32	32	4	4	C28
1488	M. abscessus	32	8	>32	>64	64	16	>16	2	>4	>8	8	16	>64	2	2	128	256	32	16	8	8	C28
1924	M. abscessus	32	>8	>32	>64	64	16	>16	0.5	>4	>8	>8	32	>64	1	1	1024	1024	32	32	16	16	C28
2556	M. abscessus	32	>8	>32	>64	64	16	>16	1	>4	>8	>8	16	>64	2	2	256	256	32	32	8	16	C28
1877	M. abscessus	>32	>8	>32	>64	128	16	>16	2	>4	>8	>8	8	>64	2	2	512	256	32	32	8	8	C28
811	M. abscessus	>32	>8	>32	>64	64	>16	>16	1	>4	>8	>8	32	>64	8	16	1024	1024	32	32	8	8	T28
2427	M. massiliense	32	8	>32	>64	128	16	>16	2	>4	>8	>8	16	>64	0.25	0.25	512	256	16	32	8	8	Truncated
1021	M. bolletii	32	>8	>32	>64	32	16	>16	1	4	>8	4	8	>64	2	>16	256	256	16	16	8	8	T28
1901	M. abscessus	>32	>8	>32	>64	64	>16	>16	2	>4	>8	>8	32	>64	0.5	8	512	512	32	32	8	8	T28
N37	M. abscessus	32	8	>32	>64	128	16	>16	0.5	>4	>8	>8	16	>64	16	16	512	256	64	32	8	8	T28
1941	M. abscessus	32	>8	>32	>64	64	16	>16	1	>4	>8	>8	32	>64	16	16	256	512	64	32	8	4	T28
N35	M. abscessus	32	8	>32	>64	16	16	16	0.25	4	>8	8	8	64	0.12	16	>1024	512	>64	32	16	16	T28
1380	M. abscessus	>32	>8	>32	>64	64	8	>16	1	>4	>8	>8	8	>64	2	2	256	256	16	16	4	4	C28
1424	M. abscessus	>32	8	>32	>64	128	16	>16	1	>4	>8	>8	16	>64	0.25	16	256	256	2	1	1	0.5	T28
1779	M. bolletii	>32	>8	>32	>64	64	16	>16	2	>4	>8	>8	16	>64	0.25	>16	256	256	16	8	4	4	T28
1509	M. bolletii	>32	>8	>32	>64	128	16	>16	2	>4	>8	>8	2	>64	2	8	256	256	16	16	4	4	T28
1857	M. abscessus	>32	>8	>32	>64	64	4	>16	4	>4	>8	>8	32	>64	8	16	512	256	2	2	1	1	T28
2543	M. abscessus	>32	>8	>32	>64	128	8	>16	2	>4	>8	>8	16	>64	8	8	512	512	2	2	1	1	T28
1920	M. abscessus	>32	>8	>32	>64	128	16	>16	2	>4	>8	>8	64	>64	>16	>16	512	512	2	2	2	0.5	T28
708	M. abscessus	>32	8	>32	>64	32	>16	>16	1	>4	>8	>8	32	>64	8	8	256	256	2	2	1	1	T28
975	M. massiliense	32	>8	>32	>64	128	>16	>16	2	>4	>8	>8	16	>64	0.5	0.5	256	256	16	16	8	8	Truncated
1890	M. abscessus	>32	>8	>32	>64	128	>16	>16	4	>4	>8	>8	32	>64	2	16	256	256	2	1	1	0.5	T28
1370	M. abscessus	>32	>8	>32	>64	64	16	>16	2	>4	>8	>8	16	>64	0.5	8	512	256	4	2	4	2	T28
1768	M. abscessus	>32	>8	>32	>64	64	>16	>16	2	>4	>8	>8	16	>64	>16	>16	256	256	4	2	2	2	T28
1051	M. massiliense	>32	>8	>32	>64	64	>16	>16	4	>4	>8	>8	32	>64	1	1	512	512	16	32	8	8	Truncated
2480	M. abscessus	>32	>8	>32	>64	128	>16	>16	2	>4	>8	>8	32	>64	0.5	8	256	256	4	4	2	2	T28
1942	M. abscessus	>32	>8	>32	>64	64	>16	>16	4	>4	>8	>8	32	>64	1	1	512	256	4	2	2	2	C28
5K773	M. massiliense	16	1	16	64	128	4	4	2	2	8	2	8	>64	0.5	0.5	512	256	32	32	8	8	Truncated
1859	M. abscessus	>32	>8	>32	>64	64	4	>16	2	>4	>8	>8	16	>64	1	8	512	256	8	8	4	4	T28
1898	M. abscessus	16	8	>32	>64	>128	8	>16	0.12	4	>8	4	8	>64	0.5	>16	512	512	8	8	8	8	T28
N45	M. abscessus	>32	8	>32	>64	128	16	>16	2	>4	>8	8	32	>64	0.5	>16	256	256	8	8	4	4	T28
1384	M. abscessus	32	>8	>32	>64	64	16	>16	1	4	>8	8	8	>64	2	2	512	512	8	8	4	4	C28
1909	M. abscessus	32	>8	>32	>64	64	16	>16	1	>4	>8	>8	16	>64	2	16	1024	1024	8	8	8	4	T28
711	M. abscessus	>32	>8	>32	>64	64	16	>16	2	>4	>8	>8	32	>64	2	>16	1024	1024	8	8	4	4	T28
1772	M. abscessus	>32	>8	>32	>64	128	>16	>16	2	>4	>8	>8	32	>64	0.5	8	512	256	8	4	4	4	T28
1781	M. abscessus	>32	>8	>32	>64	128	>16	>16	2	>4	>8	>8	32	>64	2	2	1024	512	8	8	4	4	C28
6K649	M. abscessus	16	2	32	64	128	8	8	0.25	4	>8	8	16	64	0.5	8	512	256	16	16	4	4	T28
N41	M. bolletii	8	8	>32	>64	32	16	16	0.25	4	>8	4	8	>64	0.12	8	256	256	32	32	8	8	T28
5L175	M. abscessus	32	>8	>32	>64	16	4	>16	2	>4	>8	>8	8	>64	8	16	256	256	16	16	4	4	T28
N4	M. bolletii	8	4	>32	>64	64	16	>16	0.5	>4	>8	4	16	>64	≤0.06	8	1024	512	32	32	16	16	T28
2173	M. abscessus	8	8	32	>64	32	8	>16	0.5	>4	>8	4	8	>64	0.5	16	512	256	16	32	4	4	T28
1847	M. abscessus	>32	>8	>32	>64	64	8	>16	4	>4	>8	>8	32	>64	2	16	256	256	16	8	4	4	T28
1915	M. abscessus	>32	>8	>32	>64	128	16	>16	1	>4	>8	>8	32	>64	0.5	>16	512	256	16	16	8	4	T28
1856	M. bolletii	32	>8	>32	>64	128	16	>16	1	>4	>8	>8	8	>64	>16	>16	256	512	32	16	8	4
820	M. abscessus	>32	>8	>32	>64	64	16	>16	2	>4	>8	>8	16	>64	0.5	16	256	256	16	16	8	8	T28
1756	M. abscessus	>32	>8	>32	>64	128	16	>16	2	>4	>8	>8	32	>64	0.5	>16	512	512	16	32	16	8	T28
2431	M. abscessus	>32	>8	>32	>64	32	>16	1	0.12	2	>8	0.5	4	>64	0.25	8	1024	512	16	16	8	8	T28
1782	M. abscessus	>32	>8	>32	>64	64	>16	>16	1	>4	>8	>8	32	>64	0.25	8	512	512	16	8	4	4	T28
1842	M. bolletii	>32	>8	>32	>64	128	16	>16	2	>4	>8	8	16	>64	0.5	8	1024	1024	32	16	16	16	T28
1891	M. abscessus	>32	>8	>32	>64	128	>16	>16	1	>4	>8	>8	32	>64	2	>16	512	512	16	16	8	8	T28
759	M. abscessus	>32	>8	>32	>64	64	>16	>16	2	>4	>8	>8	32	>64	2	8	1024	1024	16	16	16	8	T28
1774	M. abscessus	>32	>8	>32	>64	128	>16	>16	2	>4	>8	>8	32	>64	1	8	256	256	16	16	4	4	T28
1848	M. bolletii	>32	>8	>32	>64	128	16	>16	2	>4	>8	>8	16	>64	0.25	8	256	512	32	32	8	8	T28
1855	M. bolletii	>32	>8	>32	>64	128	>16	>16	1	>4	>8	>8	32	>64	>16	>16	256	256	32	16	4	4
N40	M. massiliense	≤1	4	>32	>64	64	>16	>16	1	4	>8	8	16	>64	≤0.06	≤0.06	512	512	32	16	4	4	Truncated
1943	M. abscessus	>32	>8	>32	>64	128	>16	>16	2	>4	>8	>8	32	>64	2	>16	1024	512	16	16	4	4	T28
1929	M. abscessus	>32	>8	>32	>64	64	>16	>16	4	>4	>8	>8	32	>64	1	1	1024	1024	16	16	8	8	Truncated
1784	M. abscessus	>32	>8	>32	>64	64	>16	>16	4	>4	>8	>8	64	>64	0.5	8	128	128	16	16	8	4	T28
2157	M. abscessus	32	4	>32	>64	128	16	>16	0.5	>4	>8	>8	32	>64	1	8	256	256	32	32	8	4	T28
1889	M. abscessus	>32	>8	>32	>64	64	16	>16	1	>4	>8	8	16	>64	0.25	8	1024	1024	32	32	16	16	T28
2239	M. bolletii	>32	>8	>32	>64	128	>16	>16	1	>4	>8	>8	16	>64	0.5	8	512	512	32	32	8	8	T28
1854	M. abscessus	>32	>8	>32	>64	128	16	>16	1	>4	>8	>8	8	>64	2	>16	512	512	32	32	8	8	T28
1264	M. massiliense	>32	>8	>32	>64	128	>16	>16	2	>4	>8	>8	16	>64	0.5	0.5	512	512	32	64	32	16	Truncated
1775	M. abscessus	32	>8	>32	>64	>128	16	>16	2	>4	>8	>8	16	>64	1	8	>1024	>1024	32	16	16	8	T28
1196	M. abscessus	>32	>8	>32	>64	64	16	>16	2	>4	>8	>8	16	>64	0.5	8	512	256	32	8	4	4	T28
1197	M. bolletii	>32	>8	>32	>64	>128	>16	>16	4	>4	>8	>8	16	>64	0.5	8	512	512	32	32	8	8	T28
706	M. abscessus	>32	>8	>32	>64	128	16	>16	2	>4	>8	>8	16	>64	8	8	1024	1024	32	64	16	8	T28
N39	M. abscessus	32	>8	>32	>64	64	>16	0.5	1	4	4	4	16	>64	2	16	256	256	32	32	8	8	T28
1922	M. abscessus	>32	>8	>32	>64	128	>16	>16	1	>4	>8	>8	16	>64	2	>16	>1024	1024	32	32	16	16	T28
1930	M. abscessus	>32	>8	>32	>64	128	>16	>16	1	>4	>8	>8	16	>64	1	16	256	256	32	32	8	4	T28
2383	M. abscessus	>32	>8	>32	>64	64	>16	>16	2	>4	>8	>8	32	>64	1	1	256	256	32	32	4	4	C28
1892	M. abscessus	>32	>8	>32	>64	128	>16	>16	2	>4	>8	>8	32	>64	1	8	1024	512	32	16	8	8	T28
965	M. abscessus	>32	>8	>32	>64	64	>16	>16	4	>4	>8	>8	32	>64	0.5	8	1024	1024	32	32	16	8	T28
2094	M. abscessus	16	>8	>32	>64	64	8	>16	1	>4	>8	>8	16	>64	1	8	256	512	64	32	4	4	T28
N38	M. abscessus	>32	4	>32	64	64	16	>16	1	>4	>8	8	32	>64	0.25	8	256	256	>64	64	4	4	T28
2127	M. abscessus	>32	>8	>32	>64	64	16	>16	0.25	4	>8	4	8	>64	0.25	8	512	512	32	32	8	8	T28
1836	M. bolletii	8	>8	>32	>64	64	>16	>16	4	>4	>8	8	32	>64	8	8	512	512	32	32	8	8
1484	M. abscessus	>32	>8	>32	>64	>128	>16	>16	>4	>4	>8	>8	>64	>64	0.25	>16	256	256	2	2	1	1	T28
1837	M. abscessus	>32	>8	>32	>64	>128	>16	>16	>4	>4	>8	>8	>64	>64	>16	>16	256	256	2	2	1	1	T28
